# Supplementary material for: Towards innovation in paper dating: a MicroNIR analytical platform and chemometrics
Source: Royal Society of Chemistry journal article supplement (doi:10.1039/c8an00871j), 2018-01-01
Supplement: c8an00871j1.pdf [file c8an00871j1.pdf]

## Supplementary Information

### Towards innovation in paper dating: a MicroNIR analytical platform and chemometrics

Roberta Risoluti<sup>a\*</sup>, Stefano Materazzi<sup>a</sup>, Federica Tau<sup>a</sup>, Amalia Russo<sup>b</sup>, Francesco Saverio Romolo<sup>c</sup>

<sup>a</sup> Department of Chemistry – “Sapienza” University of Rome p.le A.Moro 5, 00185 Rome Italy

<sup>b</sup> “Archivist , Bibliography and librarianship” and “Diagnostic lab and Book Conservation”, “Suor Orsola Benincasa”  
University of Naples, Convento di S. Caterina da Siena, Via S. Caterina da Siena 37, Naples, Italy

<sup>c</sup> Section of Legal Medicine, “Sapienza” University of Rome, p.le A.Moro 5, 00185 Rome Italy

**\* Corresponding author:** Roberta Risoluti, Department of Chemistry, Sapienza - University of Rome, Piazzale Aldo Moro 5, 00185 Rome, Italy; Tel +390649913616  
fax: +390649387137  
e-mail address: roberta.risoluti@uniroma1.it

**Keywords:** MicroNIR, chemometrics, ancient paper, dating

### Table of Contents

**Figure S1.** PC 1 loadings plot of paper produced in 1700, 1800 and 1900. The graph shows the influence of variables 1350-1480 nm on the location of samples in the scores plot according to PC 1.

**Figure S2.** PC 4 loadings plot of paper produced in 1700, 1800 and 1900. The graph shows the influence of variables on the location of samples in the scores plot according to PC 4. A negative correlation in the range 1350-1440 nm and a positive correlation in the range 1440-1550 nm were found to be responsible for the discrimination between 1700 and 1800.

**Table S1.** List of all the analysed specimens, divided into books and sheets.

Figure S1

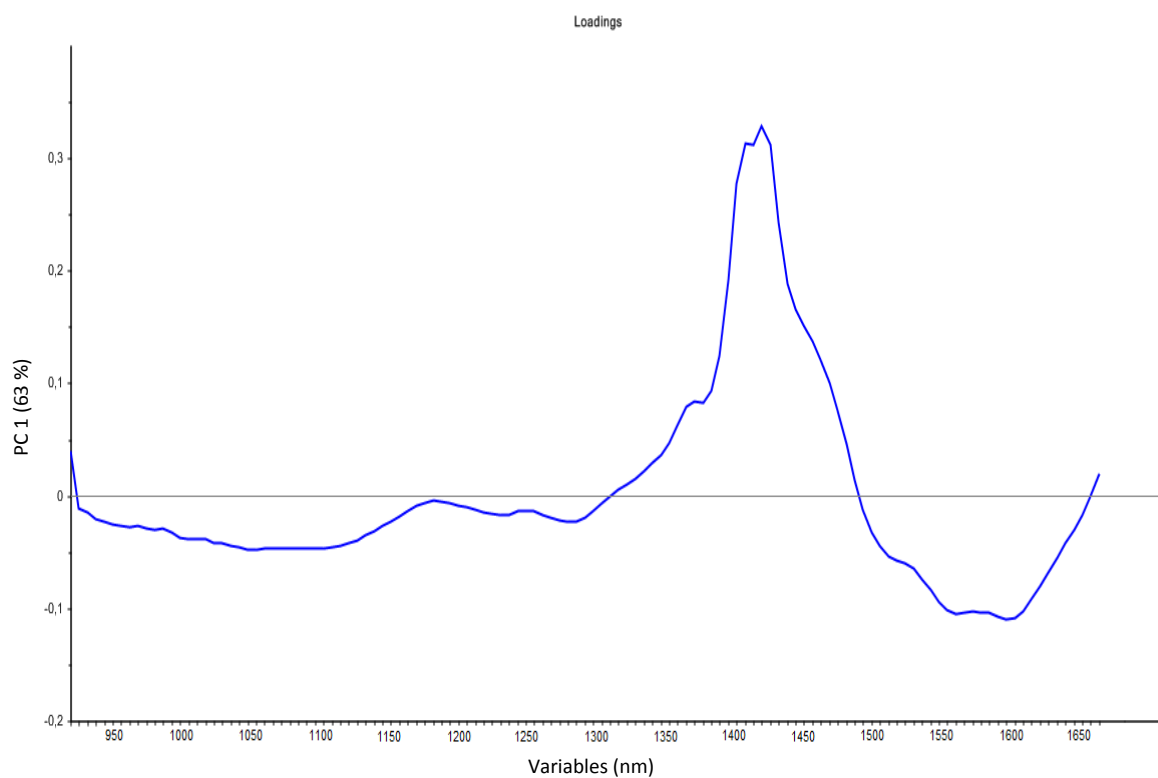

**Figure S1.** PC 1 loadings plot of paper produced in 1700, 1800 and 1900. The graph shows the influence of the variables 1300-1480 nm on the location of samples in the scores plot according to PC 1.

Figure S2

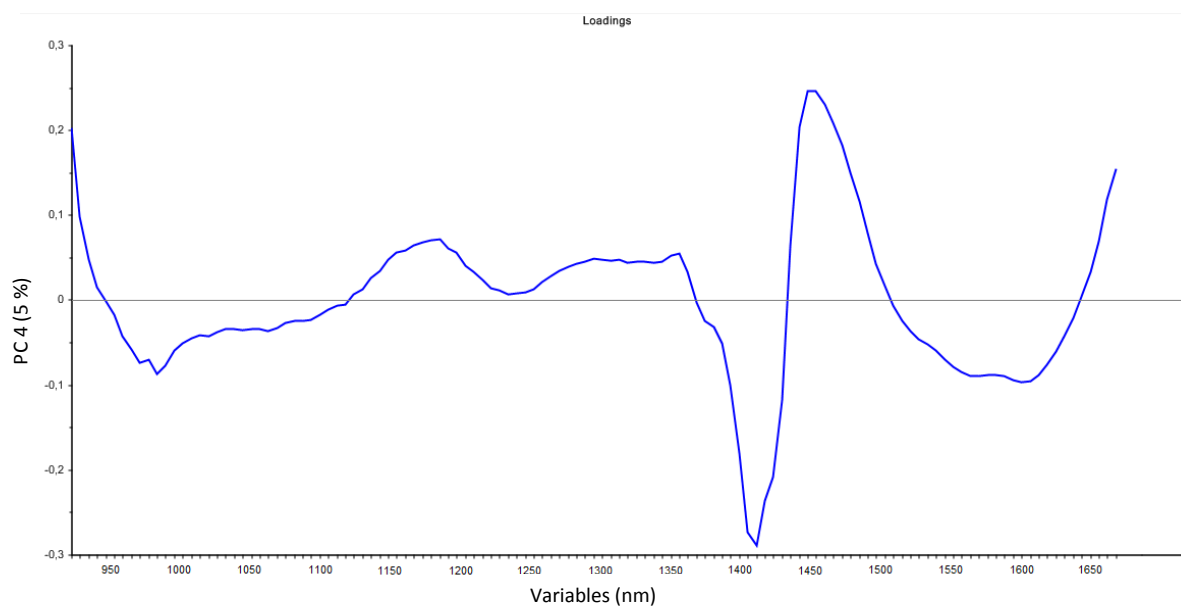

**Figure S2.** PC 4 loadings plot of paper produced in 1700, 1800 and 1900. The graph shows the influence of variables on the location of samples in the scores plot according to PC 4. A negative correlation in the range 1300-1440 nm and a positive correlation in the range 1440-1600 nm were found to be responsible for the discrimination between 1700 and 1800.

Table S1

**Table S1** List of all the analysed specimens, divided into books and sheets.

| Sample | Date (year) | n. specimen |
|--------|-------------|-------------|
| Book   | 1704        | 1           |
| Book   | 1772        | 1           |
| Book   | 1779        | 2           |
| Book   | 1783        | 4           |
| Book   | 1816        | 5           |
| Book   | 1819        | 1           |
| Book   | 1822        | 2           |
| Book   | 1828        | 7           |
| Book   | 1829        | 1           |
| Book   | 1835        | 1           |
| Book   | 1837        | 1           |
| Book   | 1838        | 1           |
| Book   | 1840        | 2           |
| Book   | 1846        | 7           |
| Book   | 1847        | 1           |
| Book   | 1855        | 1           |
| Book   | 1871        | 1           |
| Book   | 1872        | 1           |
| Book   | 1876        | 2           |
| Book   | 1879        | 1           |
| Book   | 1893        | 3           |
| Book   | 1896        | 1           |
| Book   | 1899        | 1           |
| Book   | 1900        | 2           |
| Book   | 1901        | 1           |
| Book   | 1902        | 5           |
| Book   | 1903        | 4           |
| Book   | 1904        | 2           |
| Book   | 1905        | 2           |
| Book   | 1906        | 2           |
| Book   | 1907        | 2           |
| Book   | 1908        | 3           |
| Book   | 1909        | 1           |
| Book   | 1910        | 2           |
| Book   | 1911        | 2           |
| Book   | 1912        | 2           |
| Book   | 1913        | 2           |
| Book   | 1914        | 1           |
| Book   | 1921        | 1           |
| Book   | 1922        | 1           |
| Book   | 1924        | 1           |
| Book   | 1925        | 1           |
| Book   | 1927        | 2           |
| Book   | 1928        | 1           |
| Book   | 1929        | 1           |
| Book   | 1937        | 1           |

|       |      |   |
|-------|------|---|
| Book  | 1948 | 1 |
| Book  | 1949 | 1 |
| Book  | 1951 | 1 |
| Book  | 1952 | 2 |
| Sheet | 1500 | 4 |
| Sheet | 1600 | 4 |
| Sheet | 1700 | 6 |
| Sheet | 1800 | 3 |
| Sheet | 1834 | 1 |
| Sheet | 1837 | 1 |
| Sheet | 1862 | 1 |
| Sheet | 1882 | 1 |
| Sheet | 1918 | 1 |
| Sheet | 1921 | 1 |
| Sheet | 1922 | 1 |
| Sheet | 1926 | 3 |
| Sheet | 1927 | 2 |
| Sheet | 1930 | 1 |
| Sheet | 1932 | 1 |
| Sheet | 1934 | 1 |
| Sheet | 1937 | 1 |
| Sheet | 1941 | 1 |
| Sheet | 1942 | 1 |
| Sheet | 1953 | 1 |
| Sheet | 1978 | 1 |
| Sheet | 1981 | 1 |
| Sheet | 1982 | 1 |
| Sheet | 1984 | 1 |
| Sheet | 1987 | 1 |
| Sheet | 1989 | 1 |
| Sheet | 1991 | 1 |
| Sheet | 1992 | 1 |
| Sheet | 1996 | 1 |
| Sheet | 2000 | 1 |
| Sheet | 2009 | 1 |
| Sheet | 2016 | 1 |

---
